# Supplementary material for: Development and evaluation of a microfluidic human testicular tissue chip: a novel in vitro platform for reproductive biology and pharmacology studies
Source: Royal Society of Chemistry journal article supplement (doi:10.1039/d4lc00780h), 2025-01-01
Supplement: d4lc00780h2.pdf [file d4lc00780h2.pdf]

**Supplementary Table 1. Patient information**

| Medical record number | Age of donor patients (years) | Size of tumor (cm) | Laboratory Testing                                            | Pathology                              | Surgery method                           | Culture duration (days) | Supplemental information on tissues     |
|-----------------------|-------------------------------|--------------------|---------------------------------------------------------------|----------------------------------------|------------------------------------------|-------------------------|-----------------------------------------|
| BAL394                | 24                            | 6.3*5.9*4.9        | LDH:236U/L<br>T:4.36ug/L<br>HCG:2.32mIU/ml<br>AFP:4.84ng/ml   | Seminoma                               | Left orchiectomy+Right testicular biopsy | 14                      | Contralateral healthy testicular tissue |
| D93917                | 28                            | 7.0*5.8*6.0        | LDH:354U/L<br>T:1.37ug/L<br>HCG:1405mIU/ml<br>AFP:368.32ng/ml | Mixed Malignant Germ Cell Tumor        | Left orchiectomy+Right testicular biopsy | 14                      | Contralateral healthy testicular tissue |
| D86878                | 24                            | 3.4*2.4*2.6        | LDH:123U/L<br>T:3.57ug/L<br>HCG:0.1mIU/ml<br>AFP:5.01ng/ml    | Testicular Postpubertal-Type Teratomas | Right orchiectomy+Left testicular biopsy | 14                      | Contralateral healthy testicular tissue |
| D85735                | 32                            | 3.9*3.5*3.0        | LDH:120U/L<br>T:4.33ug/L<br>HCG:14.97mIU/ml<br>AFP:10.89ng/ml | Seminoma                               | Right orchiectomy+Left testicular biopsy | 14                      | Contralateral healthy testicular tissue |
| B81547                | 27                            | 2.3*2.1*1.8        | LDH:120U/L<br>T:5.97ug/L<br>HCG:2.31mIU/ml<br>AFP:6.92ng/ml   | Seminoma                               | Right orchiectomy+Left testicular biopsy | 14                      | Contralateral healthy testicular tissue |
| E03777                | 32                            | 2.5*2.3*2.3        | LDH:167U/L<br>T:2.21ug/L<br>HCG:<0.1mIU/ml<br>AFP:2.81ng/ml   | Sertoli Cell Tumor                     | Right orchiectomy+Left testicular biopsy | 14                      | Contralateral healthy testicular tissue |
