# Supplementary figures and images for: Development and evaluation of a microfluidic human testicular tissue chip: a novel in vitro platform for reproductive biology and pharmacology studies
Source: Royal Society of Chemistry journal article supplement (doi:10.1039/d4lc00780h), 2025-01-01

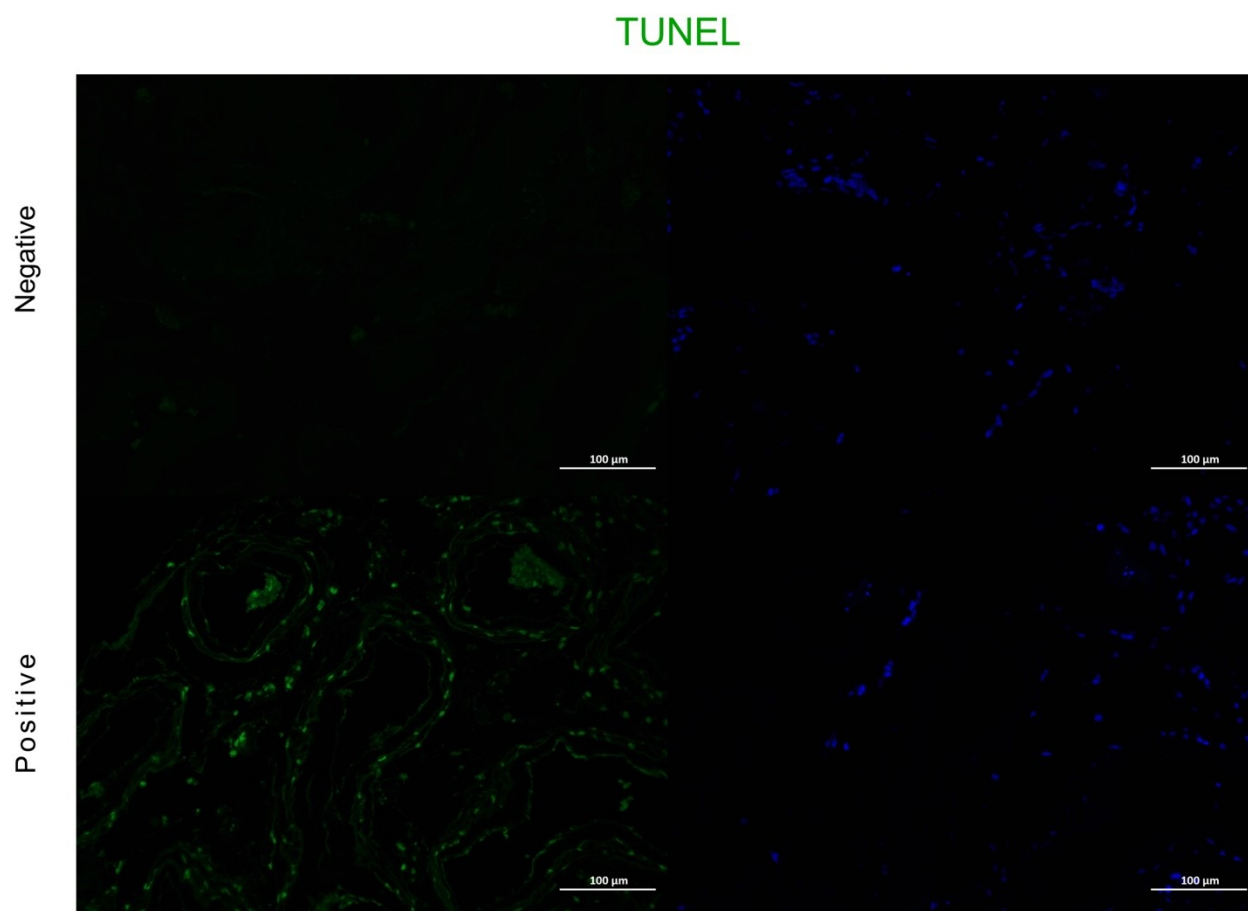

Supplemental figure 1 Positive and negative control of TUNEL staining.

Supplement: d4lc00780h1.pdf [file d4lc00780h1.pdf]
